# Supplementary material for: Fine mapping and genetic dissection of PmCWI16926, a broad-spectrum powdery mildew resistance gene from cultivated emmer wheat
Source: Research Square preprint supplement (doi:10.21203/rs.3.rs-7647818/v1), 2025-10-15
Supplement: Supplementary file 1 [file 281cc965456df25c2d8d9493.docx]

**Table S1** *PmCWI16926*-linked markers developed by bulked segregant RNA sequencing (BSR-Seq).

| **Marker** | **Marker type** | **Location (bp)** | | **Forward primer (5′–3′)** | **Reverse primer (5′–3′)** | **Product size (bp)** |
| --- | --- | --- | --- | --- | --- | --- |
| **CS (v2.1)** | **durum cv. Svevo** |
| *YTU2BS-039* | Indel | Chr2B_19904084 | Chr2B_17017323 | ATTACAAAGTCTGCTCAACCATAC | GCCGTTGTACAGGGAGAC | 134 |
| *YTU2BS-008* | Indel | Chr2B_21609642 | Chr2B_18708570 | ACCCGTTCTTCACTTGCTCT | TGCGGATTCATGGGCTAC | 155 |
| *YTU2BS-011* | SSR | Chr2B_22674893 | Chr2B_19815096 | GGTTGACCCTCCCTTTTCAT | TCAGTGCGTGGATTCTTTTT | 274 |
| *YTU2BS-045* | SSR | Chr2B_24546153 | Chr2B_21700330 | TGCTCAGTGACCTCTCAACC | AAACCTGAAAAACAGGCTGG | 211 |
| *YTU2BS-062* | Indel | Chr2B_25136394 | Chr2B_22293104 | ACCGATCTGTCCTTCCTTTGTG | GCGGTAGGCAGGCATGTTAT | 314 |
| *YTU2BS-072* | Indel | Chr2B_25268229 | Chr2B_22424493 | ACGAGCACTAGCAGAGTCGTC | ATGTTAAGGATCTGCCTATAGGG | 277 |
| *YTU2BS-058* | SSR | Chr2B_25530163 | Chr2B_22623236 | TTTGCTTTACAATCCTTGCG | ACTGCAAGCCAAGCCTAAAT | 239 |
| *YTU2BS-012* | Indel | Chr2B_25621612 | Chr2B_22715421 | AGGTAATGTTGAGTGCCGC | ATCAACTTGTCTTCTCAGTTGTACC | 113 |
| *YTU2BS-081* | SSR | Chr2B_25621682 | Chr2B_22715491 | ACATATACAAAACCCCACGG | CATTGTTTTCACTTGCAGGG | 296 |
| *YTU2BS-023* | SSR | Chr2B_26257484 | Chr2B_23096410 | GCTTAGTTCGCTTAAAAATGCC | AGGGAAACAAGCACTCCATC | 204 |
| *YTU2BS-015* | Indel | Chr2B_26617336 | Chr2B_23354780 | CCCAGTAAGCAGCCACAAA | AAATCAGGCCAACAAAGACAC | 184 |
| *YTU2BS-029* | SSR | Chr2B_27250000 | Chr2B_24020354 | TGTGTCGTGTGTAGGGTGTG | ACCTTTCATTTTTGATCGCC | 252 |
| *YTU2BS-087* | SSR | Chr2B_28286870 | Chr2B_25123316 | GACGGGAAAAGGTTGAGAAA | GCTGCCTACCAAAAGTAGCC | 215 |
