# Supplementary material for: Fine mapping and genetic dissection of PmCWI16926, a broad-spectrum powdery mildew resistance gene from cultivated emmer wheat
Source: Research Square preprint supplement (doi:10.21203/rs.3.rs-7647818/v1), 2025-10-15
Supplement: Supplementary file 2 [file ec952596df70ecde70405f76.docx]

**Table S2** Validation of *PmCWI16926*-linked markers on 46 susceptible wheat cultivars/breeding lines in marker-assisted selection (MAS) breeding.

| **Genotypes** | **Region** | **Molecular markers** | | | |
| --- | --- | --- | --- | --- | --- |
| ***YTU2BS-011*** | ***YTU2BS-045*** | ***YTU2BS-062*** | ***YTU2BS-072*** |
| Yannong 15 | Shandong | - | - | - | - |
| Yannong 17 | Shandong | - | - | - | - |
| Yannong 23 | Shandong | - | - | - | - |
| Yannong 24 | Shandong | - | - | - | - |
| Yannong 30 | Shandong | - | - | - | - |
| Yannong 31 | Shandong | - | - | - | - |
| Yannong 37 | Shandong | - | - | - | - |
| Yannong 161 | Shandong | - | - | - | - |
| Yannong 191 | Shandong | - | - | + | - |
| Yannong 215 | Shandong | - | - | - | - |
| Yannong 301 | Shandong | - | - | - | - |
| Yannong 377 | Shandong | - | - | - | - |
| Yannong 390 | Shandong | - | - | - | - |
| Yannong 836 | Shandong | - | - | - | - |
| Yannong 999 | Shandong | - | - | - | - |
| Yannong 1212 | Shandong | - | - | - | - |
| Yannong 2415 | Shandong | - | - | - | - |
| Yannong 5158 | Shandong | - | - | - | - |
| Saidemai 16 | Henan | - | + | + | - |
| Shengmai 116 | Shandong | - | - | + | - |
| Yunchengxiaomai | Shanxi | - | - | - | - |
| Tai 4123 | Shanxi | - | - | - | - |
| Nongda 4538 | Beijing | - | - | + | - |
| Zhengmai 16 | Henan | - | - | - | - |
| Xinmai 23 | Henan | - | - | - | - |
| Shijiazhuang 8 | Hebei | - | - | + | - |
| 2017 jimai | Hebei | - | + | - | - |
| Shinong 086 | Hebei | - | - | + | - |
| Taimai 101 | Shanxi | - | - | + | - |
| Luomai 013 | Shandong | - | - | - | - |
| Huaimai 16 | Jiangsu | - | - | + | - |
| Zhongmai 895 | Henan | - | - | - | - |
| Taishan 6039 | Shandong | - | - | - | - |
| Xumai 1108 | Jiangsu | - | - | - | - |
| Jimai 19 | Shandong | - | - | - | - |
| Xinmai 296 | Shanxi | - | - | - | - |
| Zhongyu 008 | Henan | - | - | - | - |
| Henan 4 | Henan | - | - | - | - |
| Huaimai 23 | Jiangsu | - | - | - | - |
| Xinong 219 | National | - | - | + | - |
| Yumai 49 | Henan | - | - | + | - |
| Chang 6878 | Shanxi | - | - | - | - |
| Shannong 1490 | Shandong | - | - | - | - |
| Shengmai 20 | Shanxi | - | - | - | - |
| Kenong 199 | National | - | - | - | - |
| Yumai 416 | Henan | - | - | - | - |

Note: "-" represents that the markers cannot amplify the polymorphic products that linked to *PmCWI16926* in relevant cultivar genetic backgrounds, and "+" represents the opposite result. The "-" in the Region column does not represent any data.
